# Supplementary material for: Solar radiation estimation in West Africa: impact of dust conditions during the 2021 dry season
Source: Copernicus journal article supplement (doi:10.5194/acp-25-997-2025), 2025-01-27
Supplement: Supplementary file 1 [file acp-25-997-2025-supplement.pdf]

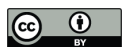

*Supplement of*

## **Solar radiation estimation in West Africa: impact of dust conditions during the 2021 dry season**

**Léo Clauzel et al.**

*Correspondence to:* Léo Clauzel ([leo.clauzel@univ-grenoble-alpes.fr](mailto:leo.clauzel@univ-grenoble-alpes.fr)) and Sandrine Anquetin ([sandrine.anquetin@univ-grenoble-alpes.fr](mailto:sandrine.anquetin@univ-grenoble-alpes.fr))

The copyright of individual parts of the supplement might differ from the article licence.

## 1 Supplementary materials

2 Several metrics are used to assess the quality of the simulations such as the Mean Absolute  
3 Error (*MAE*, eq. S1), the normalised Mean Absolute Error (*nMAE*, eq. S2), the Mean Bias  
4 Error (*MBE*, eq. S3) the Pearson correlation coefficient (*corrcoef*, eq. S4) and the Index of  
5 Agreement (*IOA*, eq. S5, Legates and McCabe, 2013) :

$$MAE = \frac{1}{N} \sum_{i=1}^N |f_i - o_i| \quad (\text{eq. S1})$$

$$nMAE = \frac{100 * MAE}{\max(o_i)} \quad (\text{eq. S2})$$

$$MBE = \frac{1}{N} \sum_{i=1}^N (f_i - o_i) \quad (\text{eq. S3})$$

$$corrcoef = \frac{\sum_{i=1}^N (o_i - \bar{o})(f_i - \bar{f})}{\sqrt{\sum_{i=1}^N (o_i - \bar{o})^2} \sqrt{\sum_{i=1}^N (f_i - \bar{f})^2}} \quad (\text{eq. S4})$$

$$IOA = 1 - \frac{\sum_{i=1}^N |f_i - o_i|}{\sum_{i=1}^N (|f_i - \bar{o}| + |o_i - \bar{o}|)} \quad (\text{eq. S5})$$

6 where *o* refers to the observations and *f* to the forecasts. The *MAE* gives equal weight to all  
7 errors and is less sensitive to outliers. *nMAE* enables the comparison of errors in data with  
8 varying amplitudes. *MBE* is used to estimate the average bias of the simulations. Lower  
9 values of *MAE*, *nMAE* and *MBE* indicate a better model accuracy. The Pearson correlation  
10 coefficient *corrcoef* measures the linear correlation between two variables. A higher  
11 absolute value of *corrcoef* suggests a stronger linear correlation. The *IOA* is a standardised  
12 measure that detects additive and proportional differences in the observed and simulated  
13 means and variances, providing a measure of the degree of model errors. An agreement  
14 value of 1 indicates a perfect match, while 0 indicates no agreement at all.

15  
16  
17  
18  
19  
20  
21  
22  
23  
24  
25  
26  
27  
28

29 **Table S1** - Dust refraction indices (real and imaginary part) for the computation of dust  
 30 radiative properties given in CHIMERE model (Menut et al., 2021 ; Kandler et al., 2007).

| $\lambda$ (nm) | $\Re(n)$ | $\Im(n)$             |
|----------------|----------|----------------------|
| 200            | 1.53     | $5.5 \times 10^{-3}$ |
| 300            | 1.53     | $5.5 \times 10^{-3}$ |
| 400            | 1.53     | $2.4 \times 10^{-3}$ |
| 600            | 1.53     | $8.9 \times 10^{-4}$ |
| 999            | 1.53     | $7.6 \times 10^{-4}$ |

31  
 32 **Table S2** - Dust aerosol radiative properties for the 10 CHIMERE aerosol size bins (Mie  
 33 theory calculation).  $r_{eff}$  is the effective radius (in  $\mu\text{m}$ ),  $Q$  is the extinction coefficient,  $SSA$  is  
 34 the single-scattering albedo and  $\omega_{1 \leq i \leq 7}$  are the first 7 terms of the Taylor expansion of the  
 35 scattering phase function.

| $\lambda$ (nm) | $r_{eff}$ | $Q$    | $SSA$  | $\omega_1$ | $\omega_2$ | $\omega_3$ | $\omega_4$ | $\omega_5$ | $\omega_6$ | $\omega_7$ |
|----------------|-----------|--------|--------|------------|------------|------------|------------|------------|------------|------------|
| <b>Dust 1</b>  |           |        |        |            |            |            |            |            |            |            |
| 200            | 0.098     | 3.7320 | 0.9763 | 2.194      | 2.688      | 2.482      | 1.887      | 1.217      | 0.611      | 0.181      |
| 300            | 0.098     | 2.1717 | 0.9751 | 1.947      | 1.789      | 1.067      | 0.482      | 0.123      | 0.024      | 0.004      |
| 400            | 0.098     | 1.1436 | 0.9858 | 1.708      | 1.146      | 0.393      | 0.106      | 0.018      | 0.002      | 0.000      |
| 600            | 0.098     | 0.3239 | 0.9911 | 0.823      | 0.627      | 0.148      | 0.018      | 0.001      | 0.000      | 0.000      |
| 999            | 0.098     | 0.0501 | 0.9764 | 0.283      | 0.515      | 0.052      | 0.002      | 0.000      | 0.000      | 0.000      |
| <b>Dust 2</b>  |           |        |        |            |            |            |            |            |            |            |
| 200            | 0.149     | 3.7097 | 0.9632 | 2.104      | 2.860      | 2.897      | 3.010      | 2.862      | 2.552      | 2.146      |
| 300            | 0.149     | 3.8024 | 0.9767 | 2.195      | 2.692      | 2.454      | 1.814      | 1.112      | 0.532      | 0.129      |
| 400            | 0.149     | 2.6412 | 0.9896 | 2.019      | 2.042      | 1.405      | 0.688      | 0.187      | 0.043      | 0.007      |
| 600            | 0.149     | 1.0626 | 0.9945 | 1.692      | 1.080      | 0.353      | 0.086      | 0.013      | 0.001      | 0.000      |
| 999            | 0.149     | 0.2111 | 0.9902 | 0.590      | 0.564      | 0.106      | 0.010      | 0.001      | 0.000      | 0.000      |
| <b>Dust 3</b>  |           |        |        |            |            |            |            |            |            |            |
| 200            | 0.210     | 2.1345 | 0.9092 | 1.596      | 2.133      | 1.578      | 1.994      | 1.824      | 2.131      | 2.247      |
| 300            | 0.210     | 3.9009 | 0.9666 | 2.148      | 2.899      | 2.956      | 2.969      | 2.727      | 2.267      | 1.743      |
| 400            | 0.210     | 3.9485 | 0.9895 | 2.199      | 2.757      | 2.609      | 2.066      | 1.394      | 0.712      | 0.210      |
| 600            | 0.210     | 2.3853 | 0.9960 | 1.955      | 1.864      | 1.152      | 0.532      | 0.136      | 0.027      | 0.004      |
| 999            | 0.210     | 0.6475 | 0.9944 | 1.300      | 0.814      | 0.240      | 0.044      | 0.005      | 0.000      | 0.000      |
| <b>Dust 4</b>  |           |        |        |            |            |            |            |            |            |            |
| 200            | 0.319     | 2.5556 | 0.8925 | 2.270      | 3.369      | 3.761      | 4.635      | 4.785      | 5.321      | 5.282      |
| 300            | 0.319     | 2.1960 | 0.9092 | 1.668      | 2.279      | 1.838      | 2.320      | 2.171      | 2.501      | 2.523      |

|                |       |        |        |       |       |       |       |       |        |        |
|----------------|-------|--------|--------|-------|-------|-------|-------|-------|--------|--------|
| 400            | 0.319 | 3.2922 | 0.9795 | 1.979 | 2.684 | 2.583 | 2.754 | 2.637 | 2.494  | 2.285  |
| 600            | 0.319 | 3.9629 | 0.9959 | 2.186 | 2.767 | 2.630 | 2.156 | 1.529 | 0.878  | 0.368  |
| 999            | 0.319 | 2.0516 | 0.9965 | 1.902 | 1.677 | 0.915 | 0.394 | 0.096 | 0.0018 | 0.002  |
| <b>Dust 5</b>  |       |        |        |       |       |       |       |       |        |        |
| 200            | 0.493 | 2.3054 | 0.8513 | 2.348 | 3.416 | 3.827 | 4.710 | 5.112 | 5.940  | 6.348  |
| 300            | 0.493 | 2.5953 | 0.8929 | 2.308 | 3.427 | 3.866 | 4.744 | 4.917 | 5.454  | 5.440  |
| 400            | 0.493 | 2.1819 | 0.9516 | 1.772 | 2.579 | 2.321 | 3.101 | 2.976 | 3.461  | 3.335  |
| 600            | 0.493 | 3.2132 | 0.9919 | 1.942 | 2.640 | 2.511 | 2.720 | 2.639 | 2.565  | 2.416  |
| 999            | 0.493 | 3.8226 | 0.9967 | 2.185 | 2.680 | 2.455 | 1.835 | 1.148 | 0.559  | 0.141  |
| <b>Dust 6</b>  |       |        |        |       |       |       |       |       |        |        |
| 200            | 0.740 | 2.2360 | 0.8042 | 2.468 | 3.652 | 4.293 | 5.309 | 5.916 | 6.898  | 7.500  |
| 300            | 0.740 | 2.3054 | 0.8513 | 2.348 | 3.416 | 3.827 | 4.710 | 5.112 | 5.940  | 6.348  |
| 400            | 0.740 | 2.3952 | 0.9387 | 2.246 | 3.260 | 3.478 | 4.195 | 4.192 | 4.693  | 4.664  |
| 600            | 0.740 | 2.1753 | 0.9814 | 1.743 | 2.548 | 2.247 | 3.033 | 2.875 | 3.368  | 3.226  |
| 999            | 0.740 | 3.6805 | 0.9946 | 2.059 | 2.801 | 2.789 | 2.883 | 2.713 | 2.402  | 2.034  |
| <b>Dust 7</b>  |       |        |        |       |       |       |       |       |        |        |
| 200            | 1.110 | 2.1857 | 0.7495 | 2.569 | 3.858 | 4.727 | 5.865 | 6.735 | 7.882  | 8.748  |
| 300            | 1.110 | 2.2360 | 0.8042 | 2.468 | 3.652 | 4.293 | 5.309 | 5.916 | 6.898  | 7.500  |
| 400            | 1.110 | 2.2944 | 0.9186 | 2.297 | 3.379 | 3.695 | 4.645 | 4.948 | 5.820  | 6.124  |
| 600            | 1.110 | 2.3941 | 0.9752 | 2.207 | 3.211 | 3.365 | 4.083 | 4.025 | 4.531  | 4.466  |
| 999            | 1.110 | 2.0755 | 0.9851 | 1.562 | 2.172 | 1.571 | 2.123 | 1.865 | 2.256  | 2.223  |
| <b>Dust 8</b>  |       |        |        |       |       |       |       |       |        |        |
| 200            | 1.654 | 2.1364 | 0.6889 | 2.657 | 4.059 | 5.165 | 6.427 | 7.555 | 8.848  | 9.972  |
| 300            | 1.654 | 2.1891 | 0.7509 | 2.568 | 3.856 | 4.722 | 5.859 | 6.726 | 7.871  | 8.735  |
| 400            | 1.654 | 2.2338 | 0.8903 | 2.401 | 3.552 | 4.017 | 5.023 | 5.482 | 6.490  | 6.998  |
| 600            | 1.654 | 2.2906 | 0.9666 | 2.247 | 3.311 | 3.526 | 4.468 | 4.678 | 5.547  | 5.782  |
| 999            | 1.654 | 2.6197 | 0.9823 | 2.219 | 3.316 | 3.603 | 4.482 | 4.524 | 5.079  | 4.986  |
| <b>Dust 9</b>  |       |        |        |       |       |       |       |       |        |        |
| 200            | 2.466 | 2.1087 | 0.6323 | 2.736 | 4.273 | 5.630 | 7.055 | 8.436 | 9.888  | 11.257 |
| 300            | 2.466 | 2.1359 | 0.6895 | 2.656 | 4.056 | 5.158 | 6.419 | 7.542 | 8.834  | 9.953  |
| 400            | 2.466 | 2.1796 | 0.8520 | 2.480 | 3.693 | 4.303 | 5.373 | 6.006 | 7.126  | 7.815  |
| 600            | 2.466 | 2.2386 | 0.9541 | 2.338 | 3.463 | 3.792 | 4.789 | 5.113 | 6.112  | 6.505  |
| 999            | 2.466 | 2.3090 | 0.9723 | 2.222 | 3.248 | 3.416 | 4.291 | 4.467 | 5.291  | 5.539  |
| <b>Dust 10</b> |       |        |        |       |       |       |       |       |        |        |
| 200            | 3.915 | 2.0781 | 0.5812 | 2.801 | 4.490 | 6.092 | 7.706 | 9.317 | 10.939 | 12.530 |
| 300            | 3.915 | 2.1031 | 0.6236 | 2.746 | 4.306 | 5.701 | 7.154 | 8.571 | 10.049 | 11.452 |



|     |       |        |        |       |       |       |        |       |       |       |
|-----|-------|--------|--------|-------|-------|-------|--------|-------|-------|-------|
| 400 | 3.915 | 2.1224 | 0.7926 | 2.565 | 3.854 | 4.658 | 5.801  | 6.653 | 7.879 | 8.785 |
| 600 | 3.915 | 2.1676 | 0.9321 | 2.410 | 3.585 | 4.010 | 5.053  | 5.504 | 6.612 | 7.155 |
| 999 | 3.915 | 2.2181 | 0.9614 | 2.319 | 3.430 | 3.722 | 4.7000 | 4.977 | 5.945 | 6.289 |

---

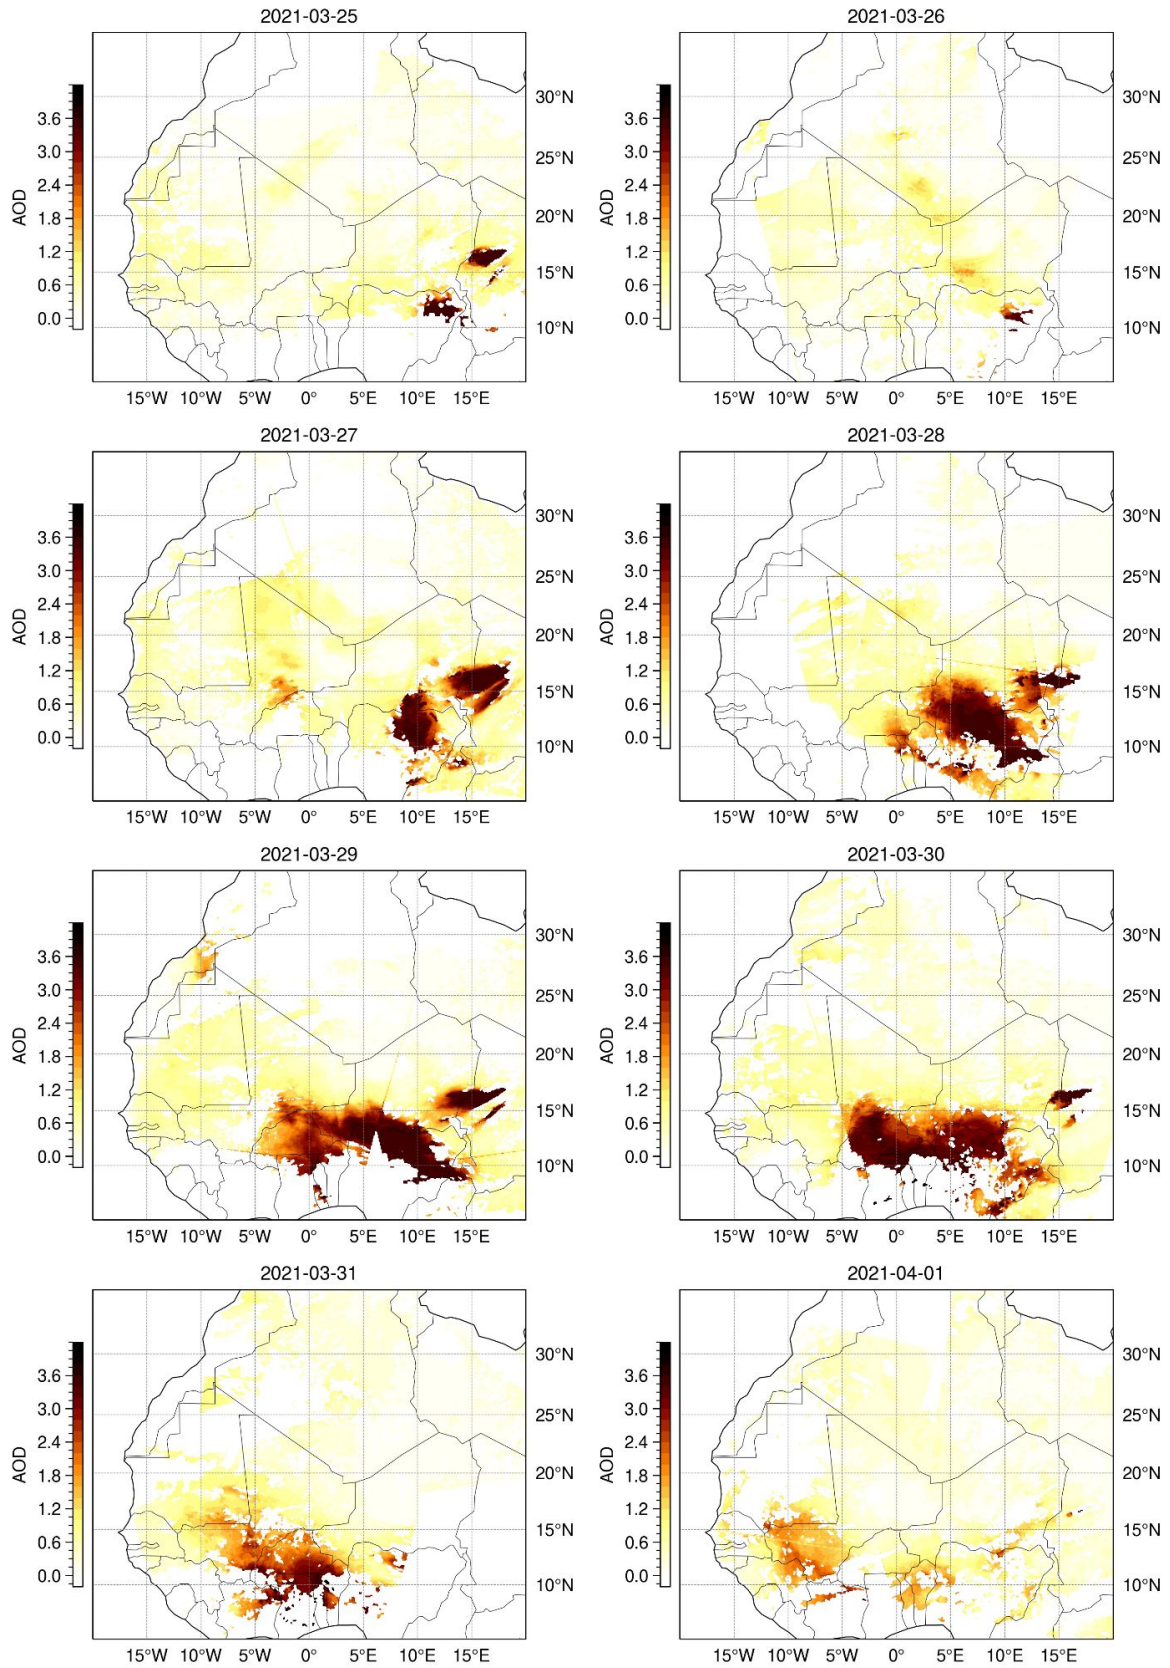

37  
38  
39

**Figure S1** - Daily mean Aerosol Optical Depth at 550nm from MODIS satellite observations from 25 March to 01 April 2021.

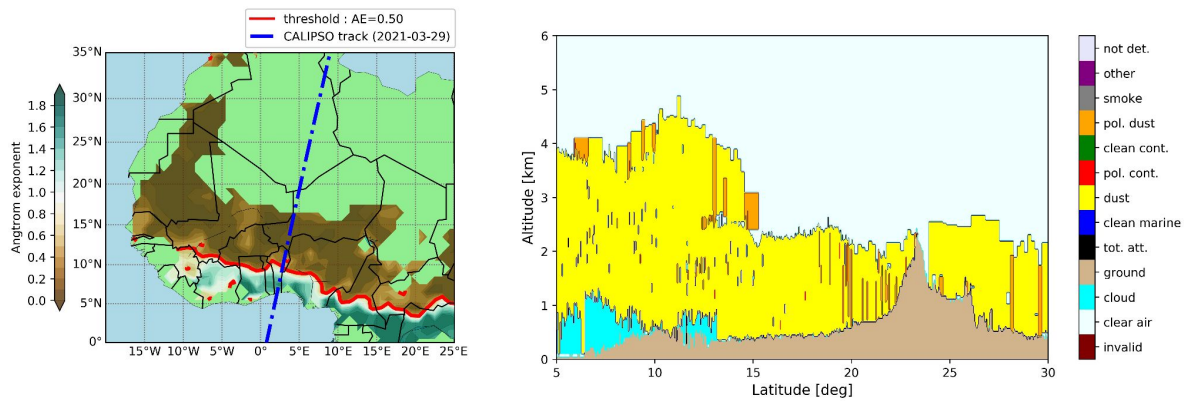

40  
 41 **Figure S2** - The left panel displays the MODIS level 3 Ångström Exponent averaged over  
 42 the case study period (28 March to 01 April 2021) for MODIS AOD values greater than 0.5.  
 43 The blue dashed lines represent the CALIPSO satellite track on 29 March 2021. The right  
 44 panel shows the CALIOP Vertical Feature Mask (VFM) from the CALIPSO satellite overpass  
 45 on 29 March 2021.  
 46

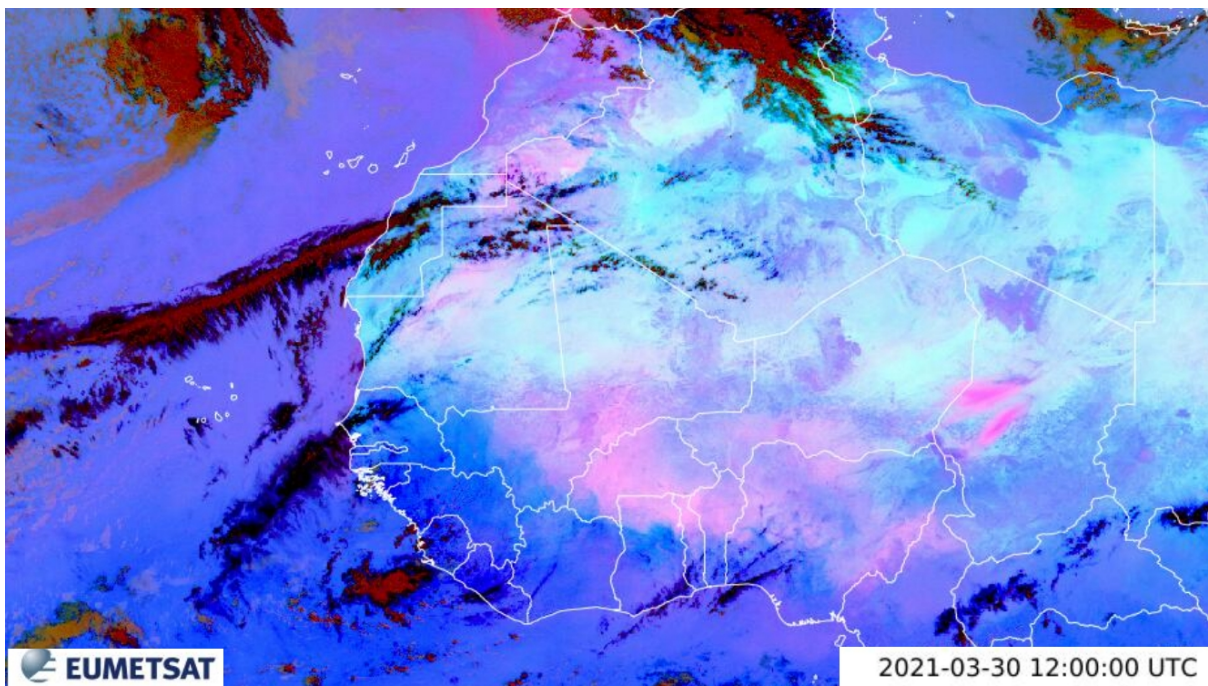

47  
 48 **Figure S3** - MSG Dust RGB composite on 30 March 2021 at 12h. Pink areas correspond to  
 49 dust plumes, black areas are cirrus clouds with no clouds below, red refers to thick, high and  
 50 cold ice clouds.  
 51



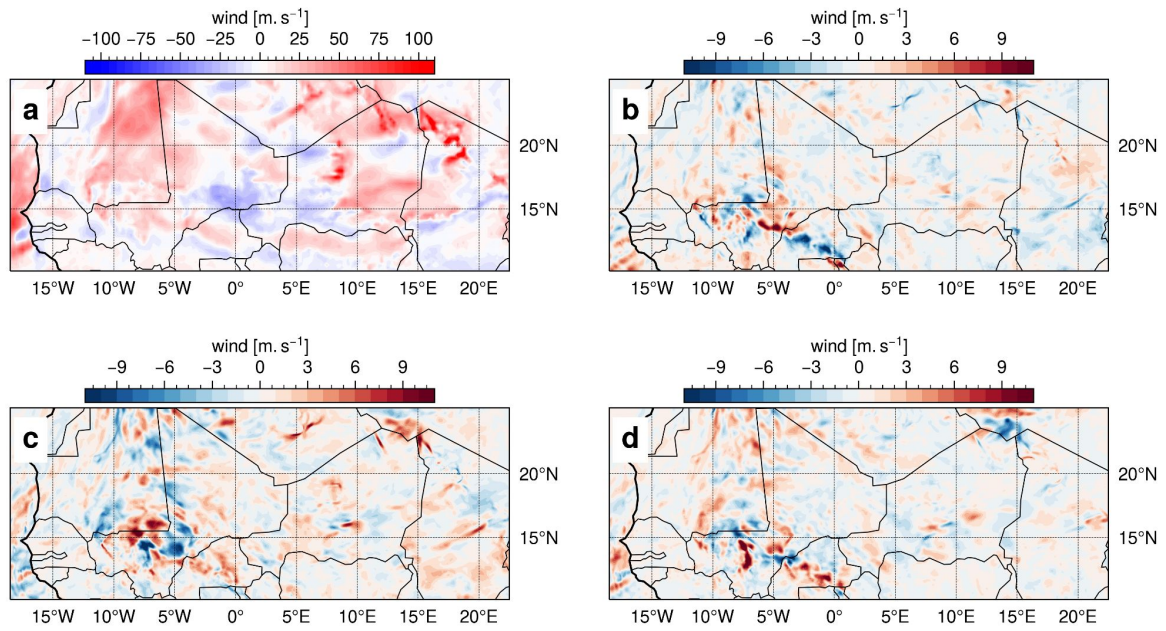

52  
 53 **Figure S4** - Squared surface wind speed on March 28th at 10h with a) the difference  
 54 between the three WRF-CHIMERE simulation average and ERA5 reanalysis. For panels b, c  
 55 and d, squared surface wind speed on March 28th at 10h differences between each of the  
 56 WRF-CHIMERE simulations driven by GOCART, MERRA2 and CAMS, respectively, and the  
 57 mean of the three WRF-CHIMERE simulations. The time used for the figure was selected  
 58 since it corresponds to the maximum of dust emission flux during case study. The surface  
 59 wind speed is squared, given that dust emissions are determined by wind velocities with a  
 60 squared velocity.  
 61
